# Supplementary material for: Active Case Finding for Tuberculosis in India: A Syntheses of Activities and Outcomes Reported by the National Tuberculosis Elimination Programme
Source: MDPI journal article supplement (doi:10.3390/tropicalmed6040206), 2021-11-30
Supplement: s1 [file s1]

**Supplementary Table S1.** Summary of the completeness of reporting of ACF activities.

| Implementor       | ACF rounds |          | Mapping           |                   | Screening        |           |            |                    | Diagnosis          |                      |                  | Treatment    |                      | Impact             | Data                   |                  |
|-------------------|------------|----------|-------------------|-------------------|------------------|-----------|------------|--------------------|--------------------|----------------------|------------------|--------------|----------------------|--------------------|------------------------|------------------|
|                   | Frequency  | Duration | Target Population | Basis for mapping | Persons screened | Personnel | Incentives | Linkage to testing | Screening outcomes | Diagnostic algorithm | Case definitions | Test results | Treatment initiation | Treatment outcomes | Impact on notification | Amount of detail |
| Andaman & Nicobar | A          | A        | A                 | A                 | A                | A         | A          | PA                 | A                  | A                    | A                | A            | A                    | A                  | NA                     | PC               |
| Andhra Pradesh    | A          | A        | A                 | A                 | A                | A         | A          | A                  | A                  | A                    | A                | PA           | A                    | A                  | NA                     | YC               |
| Bihar             | A          | A        | A                 | A                 | A                | A         | A          | A                  | PA                 | A                    | A                | A            | NA                   | NA                 | NA                     | PD               |
| Gujarat           | A          | A        | A                 | A                 | A                | A         | PA         | A                  | A                  | A                    | A                | A            | PA                   | NA                 | NA                     | PD               |
| Karnataka         | A          | A        | A                 | A                 | A                | PA        | A          | A                  | PA                 | A                    | A                | A            | NA                   | NA                 | NA                     | PD               |
| Ladakh            | A          | A        | A                 | A                 | A                | A         | A          | A                  | NA                 | A                    | A                | A            | A                    | A                  | NA                     | PC               |
| Maharashtra       | A          | A        | A                 | A                 | A                | A         | A          | A                  | A                  | A                    | A                | A            | A                    | NA                 | NA                     | PD               |
| Manipur           | A          | A        | A                 | A                 | A                | A         | PA         | A                  | A                  | A                    | A                | A            | NA                   | NA                 | NA                     | YC               |
| Mizoram           | A          | A        | A                 | A                 | A                | A         | A          | A                  | A                  | A                    | A                | A            | A                    | A                  | NA                     | YC               |
| Tamil Nadu        | A          | NA       | A                 | A                 | A                | A         | A          | A                  | A                  | A                    | A                | PA           | PA                   | NA                 | NA                     | YC               |
| Uttarakhand       | A          | A        | PA                | PA                | NA               | NA        | NA         | NA                 | NA                 | NA                   | NA               | A            | NA                   | NA                 | NA                     | YC               |
| The Union: Axshya | A          | A        | A                 | A                 | A                | A         | A          | A                  | PA                 | A                    | A                | A            | A                    | NA                 | NA                     | YC               |
| ICMR: TIE-TB      | A          | A        | A                 | A                 | PA               | PA        | NA         | A                  | PA                 | A                    | A                | A            | A                    | A                  | A                      | PD               |
| KHPT: THALI       | A          | A        | A                 | A                 | A                | A         | PA         | A                  | PA                 | A                    | A                | PA           | A                    | NA                 | NA                     | YC               |
| WHP: THALI        | A          | A        | A                 | A                 | A                | A         | A          | A                  | PA                 | A                    | A                | A            | A                    | NA                 | NA                     | YC               |
| WVI: Axshya       | A          | A        | A                 | A                 | A                | A         | PA         | A                  | PA                 | A                    | A                | PA           | A                    | NA                 | NA                     | YC               |

Evaluation of the adequacy of reporting from returned data-proformas. Key: A = Adequate; PA = Partly adequate; PC = Phase-wise, consolidated; PD = Phase-wise, district-wise; NA = not available; YC = Year/years, consolidated. Abbreviations: ICMR = Indian Council for Medical Research; KHPT = Karnataka Health Promotion Trust; WHP = World Health Partners; WVI = World Vision India.

**Supplementary Table S2.** Summary data from the National Tuberculosis Elimination Programme for active case finding (ACF) activities in 2018 from states and union territories (ranked by population size) \*.

| State/Union Territory | Vulnerable Target Population Mapped | Numbers Screened from Mapped Target Population (%) | Numbers with Presumptive TB Tested from Those Screened (%) | TB Diagnosed in Those Tested (%; 95% CI) | Number Needed to Screen (NNS) |
|-----------------------|-------------------------------------|----------------------------------------------------|------------------------------------------------------------|------------------------------------------|-------------------------------|
| Uttar Pradesh         | 75,435,905                          | 71,302,155 (95)                                    | 479,446 (0.7)                                              | 21,779 (4.5; 4.4 to 4.6)                 | 3,274                         |
| Maharashtra           | 18,901,687                          | 16,853,553 (89)                                    | 61,604 (0.4)                                               | 4,143 (6.7; 6.5 to 6.9)                  | 4,068                         |
| Bihar                 | 9,747,689                           | 3,148,051 (32)                                     | 51,380 (1.6)                                               | 2,483 (5.5; 5.4 to 5.7)                  | 1,268                         |
| West Bengal           | 10,857,140                          | 10,021,058 (92)                                    | 173,825 (1.7)                                              | 1,878 (1.1; 1.0 to 1.1)                  | 5,336                         |
| Madhya Pradesh        | NA                                  | NA                                                 | NA                                                         | NA                                       | NA                            |
| Tamil Nadu            | 3,566,777                           | 2,972,314 (83)                                     | 357,667 (12.0)                                             | 1,528 (0.43; 0.41 to 0.45)               | 1,945                         |
| Rajasthan             | 2,094,000                           | 1,691,000 (81)                                     | 29,161 (1.7)                                               | 606 (2.1; 1.9 to 2.3)                    | 2,790                         |
| Gujarat               | 22,410,251                          | 17,880,000 (80)                                    | 99,636 (0.6)                                               | 4,154 (4.2; 4.1 to 4.3)                  | 4,307                         |
| Karnataka             | 10,347,300                          | 10,265,692 (99)                                    | 99,946 (1.0)                                               | 2,957 (3.0; 2.9 to 3.1)                  | 3,472                         |
| Andhra Pradesh        | 9,922,758                           | 5,130,826 (52)                                     | 35,785 (100)                                               | 1,771 (4.7; 4.5 to 4.9)                  | 21                            |
| Odisha                | 4,235,030                           | 1,196,031 (28)                                     | 42,133 (3.5)                                               | 939 (2.2; 2.1 to 2.4)                    | 1,274                         |
| Jharkhand             | 3,723,237                           | 3,132,870 (84)                                     | 14,013 (0.5)                                               | 1,095 (7.8; 7.4 to 8.3)                  | 2,861                         |
| Telangana             | 3,01,509                            | 54,861 (18)                                        | 2,594 (5.4)                                                | 106 (4.1; 3.4 to 4.9)                    | 517                           |
| Assam                 | 353,946                             | 133,181 (38)                                       | 7,114 (5.3)                                                | 547 (7.7; 7.1 to 8.3)                    | 243                           |
| Kerala                | 34,100,000                          | 27,662,028 (81)                                    | 26,487 (0.1)                                               | 329 (1.2; 1.1 to 1.4)                    | 84,079                        |
| Punjab                | 6,235,317                           | 798,500 (13)                                       | 7,217 (0.9)                                                | 481 (6.7; 6.1 to 7.3)                    | 1,660                         |
| Chhattisgarh          | 29,800,000                          | 13,177,785 (44)                                    | 14,648 (0.1)                                               | 986 (6.7; 6.3 to 7.2)                    | 13,364                        |
| Haryana               | 3,688,846                           | 1,534,024 (42)                                     | 15,474 (1.0)                                               | 548 (3.5; 3.3 to 3.8)                    | 2,799                         |
| Delhi                 | 15,000                              | 4,900 (33)                                         | 324 (6.6)                                                  | 15 (4.6; 2.8 to 7.5)                     | 327                           |
| Jammu & Kashmir       | 175,378                             | 75,834 (43)                                        | 3,830 (5.1)                                                | 187 (4.9; 4.2 to 5.6)                    | 406                           |
| Uttarakhand           | 1,343,500                           | 561,649 (42)                                       | 3,658 (0.7)                                                | 270 (7.4; 6.6 to 8.3)                    | 2080                          |
| Himachal Pradesh      | 954,658                             | 925,284 (97)                                       | 11,398 (1.2)                                               | 315 (2.8; 2.5 to 3.1)                    | 2937                          |
| Tripura               | NA                                  | NA                                                 | NA                                                         | NA                                       | NA                            |
| Meghalaya             | 2,36,421                            | 148,521 (63)                                       | 705 (0.5)                                                  | 20 (2.8; 1.8 to 4.3)                     | 7426                          |
| Manipur               | NA                                  | NA                                                 | NA                                                         | NA                                       | NA                            |
| Nagaland              | 86,501                              | 11,343 (13)                                        | 1,587 (14.0)                                               | 56 (3.5; 2.7 to 4.6)                     | 202                           |

|                                      |                    |                           |                        |                                 |                                       |
|--------------------------------------|--------------------|---------------------------|------------------------|---------------------------------|---------------------------------------|
| Arunachal Pradesh                    | 92,215             | 5,040 (6)                 | 1,535 (30.5)           | 27 (1.8; 1.2 to 2.6)            | 186                                   |
| Goa                                  | 120,000            | 63,000 (53)               | 825 (1.3)              | 18 (2.2; 1.4 to 3.4)            | 3,500                                 |
| Puducherry                           | 954                | 953 (100)                 | 50 (5.3)               | 0 (0.0)                         | NA                                    |
| Mizoram                              | 5,113              | 4,186 (82)                | 434 (10.4)             | 28 (6.5; 4.5 to 9.2)            | 150                                   |
| Chandigarh                           | 2,56,000           | 9,500 (4)                 | 13 (0.1)               | 6 (46.2; 23.2 to 70.9)          | 1,583                                 |
| Dadra & Nagar Haveli and Daman & Diu | 460,000            | 320,000 (70)              | 723 (0.2)              | 18 (2.5; 1.6 to 3.9)            | 17,778                                |
| Sikkim                               | 4,779              | 1,083 (23)                | 63 (5.8)               | 2 (3.2; 0.9 to 10.9)            | 542                                   |
| Andaman & Nicobar                    | 51,203             | 3,136 (6)                 | 103 (3.3)              | 6 (5.8; 2.7 to 12.1)            | 522                                   |
| Lakshadweep                          | 69,142             | 65,482 (95)               | 183 (0.3)              | 2 (1.1; 0.3 to 3.9)             | 32,741                                |
| <b>India</b>                         | <b>249,939,256</b> | <b>189,364,840 (75.7)</b> | <b>1,543,860 (0.8)</b> | <b>47,307 (3.1; 3.0 to 3.1)</b> | <b>Median: 2080 (IQR 517 to 4068)</b> |

\*Modified from annexure 1.7 in the India TB report- 2019 [20]. Madhya Pradesh merged ACF activity with a state initiative to detect TB, Leprosy and non-communicable diseases through house-to-house surveys conducted in two blocks of every district twice a year. Manipur & Tripura did not conduct ACF in 2018. CI = Confidence interval; IQR = Interquartile range.

**Supplementary Table S3.** Summary data from the National Tuberculosis Elimination Programme for active case finding (ACF) activities in 2019 from states and union territories (ranked by population size) \*.

| State/Union Territory | Vulnerable Target Population Mapped | Numbers Screened from Mapped Target Population | Numbers with Presumptive TB Tested from Those Screened (%) | TB Diagnosed in Those Tested (%; 95% CI) | Number Needed to Screen (NNS) |
|-----------------------|-------------------------------------|------------------------------------------------|------------------------------------------------------------|------------------------------------------|-------------------------------|
| Uttar Pradesh         | 71,011,915                          | 68,429,974 (96)                                | 428,042 (0.6)                                              | 20,807 (4.9; 4.8 to 4.9)                 | 3,288                         |
| Maharashtra           | 95,163,760                          | 87,568,441 (92)                                | 211,750 (0.2)                                              | 9,737 (4.6; 4.5 to 4.7)                  | 8,993                         |
| Bihar                 | 29,500,000                          | 10,185,550 (35)                                | 14,252 (0.1)                                               | 709 (5.0; 4.6 to 5.3)                    | 14,366                        |
| West Bengal           | 16,886,918                          | 15,756,571 (93)                                | 300,103 (1.9)                                              | 2,657 (0.9; 0.8 to 0.9)                  | 5,930                         |
| Madhya Pradesh        | NA                                  | NA                                             | NA                                                         | NA                                       | NA                            |
| Tamil Nadu            | 7,436,669                           | 2,680,756 (36)                                 | 40,703 (1.5)                                               | 2,542 (6.3; 6.0 to 6.5)                  | 1,054                         |
| Rajasthan             | 14,822,610                          | 10,551,160 (71)                                | 85,159 (0.8)                                               | 3,243 (3.8; 3.7 to 3.9)                  | 3,254                         |
| Gujarat               | 20,469,660                          | 15,833,566 (77)                                | 90,318 (0.6)                                               | 1,998 (2.2; 2.1 to 2.3)                  | 7,924                         |
| Karnataka             | 19,335,483                          | 299,157 (2)                                    | 253,601 (84.8)                                             | 4,841 (1.9; 1.8 to 2.0)                  | 62                            |
| Andhra Pradesh        | 50,383                              | 34,923 (69)                                    | 1,035 (3.0)                                                | 25 (2.4; 1.6 to 3.5)                     | 1396                          |
| Odisha                | 5,792,098                           | 2,210,783 (38)                                 | 64,045 (2.9)                                               | 1,272 (2.0; 1.9 to 2.0)                  | 1,738                         |
| Jharkhand             | 55,720,950                          | 44,920,834 (81)                                | 34,147 (0.1)                                               | 3,902 (11.4; 11.1 to 11.8)               | 11,512                        |
| Telangana             | 7,560,886                           | 2,328,711 (24)                                 | 31,583 (1.4)                                               | 2,117 (6.7; 6.4 to 7.0)                  | 1,100                         |
| Assam                 | 187,472                             | 44,886 (24)                                    | 4,212 (9.4)                                                | 190 (4.5; 3.9 to 5.2)                    | 236                           |
| Kerala                | 775,000                             | 133,949 (17)                                   | 2,274 (1.7)                                                | 47 (2.1; 1.6 to 2.7)                     | 2,850                         |
| Punjab                | 3,612,160                           | 2,392,039 (66)                                 | 10,319 (0.4)                                               | 312 (3.0; 2.7 to 3.4)                    | 7,667                         |
| Chhattisgarh          | 29,500,000                          | 10,185,550 (35)                                | 14,252 (0.1)                                               | 709 (5.0; 4.6 to 5.3)                    | 14,366                        |
| Haryana               | 13,324,275                          | 1,568,642 (12)                                 | 12,763 (0.8)                                               | 215 (1.7; 1.5 to 1.9)                    | 7,296                         |
| Delhi                 | 4,57,453                            | 2,47,669 (54)                                  | 6,122 (2.5)                                                | 467 (7.6; 7.0 to 8.3)                    | 530                           |
| Jammu & Kashmir       | 1,208,111                           | 93,010 (8)                                     | 3,667 (3.9)                                                | 141 (3.9; 3.3 to 4.5)                    | 659                           |
| Uttarakhand           | 248,771                             | 177,699 (71)                                   | 2,433 (1.4)                                                | 72 (3.0; 2.4 to 3.7)                     | 2,468                         |
| Himachal Pradesh      | 1,817,691                           | 1,813,396 (100)                                | 41,643 (2.3)                                               | 1,449 (3.5; 3.3 to 3.7)                  | 1,251                         |
| Tripura               | 773,231                             | 55,808 (7)                                     | 55,808 (100.0%)                                            | 84 (0.2%; 0.1 to 0.2)                    | 664                           |
| Meghalaya             | 125,103                             | 57,683 (46)                                    | 997 (1.7)                                                  | 16 (1.6; 1.0 to 2.6)                     | 3,605                         |
| Manipur               | NA                                  | NA                                             | NA                                                         | NA                                       | NA                            |
| Nagaland              | 21,179                              | 11,151 (53)                                    | 1,061 (9.5)                                                | 40 (3.8; 2.8 to 5.1)                     | 279                           |

|                                      |                     |                            |                        |                                  |                                          |
|--------------------------------------|---------------------|----------------------------|------------------------|----------------------------------|------------------------------------------|
| Arunachal Pradesh                    | 50,383              | 34,923 (69)                | 1,035 (3.0)            | 25 (2.4; 1.6 to 3.5)             | 1,397                                    |
| Goa                                  | 102,563             | 83,621 (82)                | 314 (0.4)              | 1 (0.3; 0.1 to 0.2)              | 8,3621                                   |
| Puducherry                           | 46,709              | 46,709 (100)               | 245 (0.5)              | 4 (1.6; 0.6 to 4.1)              | 11,677                                   |
| Mizoram                              | 29,298              | 22,304 (76)                | 573 (2.6)              | 12 (2.1; 1.2 to 3.6)             | 1,859                                    |
| Chandigarh                           | NA                  | NA                         | NA                     | NA                               | NA                                       |
| Dadra & Nagar Haveli and Daman & Diu | 322,434             | 270,290 (84)               | 294 (0.1)              | 8 (2.7; 1.4 to 5.3)              | 33786                                    |
| Sikkim                               | 43,817              | 20,044 (46)                | 689 (3.4)              | 12 (1.7; 1.0 to 3.0)             | 1670                                     |
| Andaman & Nicobar                    | 50,000              | 5,990 (12)                 | 490 (8.2)              | 86 (17.6; 14.4 to 21.1)          | 70                                       |
| Lakshadweep                          | 70,177              | 0                          | NA                     | NA                               | NA                                       |
| <b>India</b>                         | <b>39,27,38,350</b> | <b>27,73,58,984 (70.6)</b> | <b>20,46,453 (0.7)</b> | <b>62,958 (3.1%; 3.0 to 3.1)</b> | <b>Median: 2468 (IQR = 1050 to 7924)</b> |

\*Modified from annexure 6 in the India TB report- 2020 [21]. Chandigarh, Madhya Pradesh & Manipur did not conduct separate ACF activities.
