# Supplementary material for: Active Case Finding for Tuberculosis in India: A Syntheses of Activities and Outcomes Reported by the National Tuberculosis Elimination Programme
Source: MDPI journal article supplement (doi:10.3390/tropicalmed6040206), 2021-11-30
Supplement: s1 [file s1]

**Box S1. DATA PROFORMA FOR TUBERCULOSIS ACTIVE CASE FINDING (ACF).**

**(Please note: Please fill up one proforma for each activity, if your organisation had undertaken multiple activities)**

Details reported by:

Date : dd/mm/yyyy

| Study ID: _____ (This will be assigned by the study investigators) |                                                    |                                                                                                                                                                                                                                                                                                                                                                                                  |                                                                                                                                                              |
|--------------------------------------------------------------------|----------------------------------------------------|--------------------------------------------------------------------------------------------------------------------------------------------------------------------------------------------------------------------------------------------------------------------------------------------------------------------------------------------------------------------------------------------------|--------------------------------------------------------------------------------------------------------------------------------------------------------------|
| S.No.                                                              | Particulars                                        | Details                                                                                                                                                                                                                                                                                                                                                                                          | Instructions                                                                                                                                                 |
| <b>Description of ACF activity</b>                                 |                                                    |                                                                                                                                                                                                                                                                                                                                                                                                  |                                                                                                                                                              |
| 1.                                                                 | Name of your organization                          |                                                                                                                                                                                                                                                                                                                                                                                                  | Please give the name of the organisation. If it is State TB office of Karnataka, the name of the organisation would be 'STO-Karnataka'                       |
| 2.                                                                 | Funding support                                    |                                                                                                                                                                                                                                                                                                                                                                                                  | Please specify who provided the funding support for the ACF activity. For example, the Axshya Samvad activity of the Union is supported by the 'Global Fund' |
| 3.                                                                 | Name of the State where activity was conducted     |                                                                                                                                                                                                                                                                                                                                                                                                  | Provide the list of the states of India where the ACF activity is being conducted by your organisation or the unit                                           |
| 4.                                                                 | Month and year of starting the activity            |                                                                                                                                                                                                                                                                                                                                                                                                  | Please specify the date when the ACF activity was initiated by the organisation.                                                                             |
| 5.                                                                 | Frequency of activity in an year                   | <input type="checkbox"/> Monthly<br><input type="checkbox"/> Bi-monthly<br><input type="checkbox"/> Quarterly<br><input type="checkbox"/> Throughout the year<br><input type="checkbox"/> Others: _____                                                                                                                                                                                          | Please specify how often the activity was conducted in a year by the organisation                                                                            |
| 6.                                                                 | Month and year of closing the activity             |                                                                                                                                                                                                                                                                                                                                                                                                  | Please specify the date when the ACF activity was closed by the organisation. In case the activity is still ongoing, kindly indicate as still ongoing        |
| 7.                                                                 | Duration of the activity in days                   |                                                                                                                                                                                                                                                                                                                                                                                                  | Kindly denote how many days of ACF activity has been conducted since the start of activity                                                                   |
| 8.                                                                 | Activity settings                                  | <input type="checkbox"/> Urban Slum<br><input type="checkbox"/> Urban non-slum<br><input type="checkbox"/> Rural area<br><input type="checkbox"/> Hard-to-reach areas (including tribal hamlets)<br><input type="checkbox"/> Others: _____                                                                                                                                                       | Please tick where the activity was conducted. Tick all the relevant settings.                                                                                |
| 9.                                                                 | Target population                                  | <input type="checkbox"/> General Public in the above mentioned setting<br><input type="checkbox"/> Tribals<br><input type="checkbox"/> Migrants<br><input type="checkbox"/> Refugees<br><input type="checkbox"/> Drug users<br><input type="checkbox"/> Household TB contacts<br><input type="checkbox"/> Children<br><input type="checkbox"/> Elderly<br><input type="checkbox"/> Others: _____ | Please tick among who the ACF activity was conducted. Tick all the relevant groups.                                                                          |
| 10.                                                                | Basis for selection of area and/or population      |                                                                                                                                                                                                                                                                                                                                                                                                  | Please specify what was the rationale for selection of the activity setting and target group.                                                                |
| 11.                                                                | Baseline prevalence of TB in the target population |                                                                                                                                                                                                                                                                                                                                                                                                  | If not available/known, please mention 'NA'                                                                                                                  |
| <b>Type of ACF</b>                                                 |                                                    |                                                                                                                                                                                                                                                                                                                                                                                                  |                                                                                                                                                              |
| 12.                                                                | House-to-House survey/screening                    | Yes / No                                                                                                                                                                                                                                                                                                                                                                                         | Whether the house-to-house visit was done to identify the individual with presumptive TB patient?                                                            |

|     |                                                                                                                             |                                                                                                                                                                                                                                                                                                                                                                                                                      |                                                                                                                                            |
|-----|-----------------------------------------------------------------------------------------------------------------------------|----------------------------------------------------------------------------------------------------------------------------------------------------------------------------------------------------------------------------------------------------------------------------------------------------------------------------------------------------------------------------------------------------------------------|--------------------------------------------------------------------------------------------------------------------------------------------|
| 13. | Health Education                                                                                                            | Yes / No                                                                                                                                                                                                                                                                                                                                                                                                             | Whether the the health worker provided health education during the visit to identify presumptive TB patient?                               |
| 14. | Personnel involved in the activity                                                                                          | <input type="checkbox"/> Community health worker/volunteer<br><input type="checkbox"/> Health worker from general health system<br><input type="checkbox"/> Field staff recruited for project<br><input type="checkbox"/> RNTCP staff<br><input type="checkbox"/> Anganwadi worker<br><input type="checkbox"/> Other (specify):                                                                                      | Mark multiple boxes if there are multiple answers                                                                                          |
| 15. | Whether personnel were incentivised for the ACF activity?<br>If yes, mention                                                | Yes / No                                                                                                                                                                                                                                                                                                                                                                                                             | [amount per day / amount per case]                                                                                                         |
| 16. | Target number of houses per day per health worker                                                                           |                                                                                                                                                                                                                                                                                                                                                                                                                      | How many houses each health worker involved in the ACF was supposed to cover per day?                                                      |
| 17. | Who were interviewed by the health workers for identifying presumptive TB patients through symptom screening at households? | <input type="checkbox"/> Each individual were interviewed<br><input type="checkbox"/> Interviewed the head of the household about all the household members<br><input type="checkbox"/> Interviewed the available member during the visit about all the household members<br><input type="checkbox"/> Interviewed only those available during the house visit<br><input type="checkbox"/> Others:                    | Please specify how the health workers conducted the interview to identify the presumptive TB patient on reaching the target house          |
| 18. | Symptoms included to define the presumptive TB patient for ACF                                                              | <input type="checkbox"/> Cough of any duration<br><input type="checkbox"/> Cough for more than or equal to two weeks<br><input type="checkbox"/> Fever of any duration<br><input type="checkbox"/> Fever for more than or equal to two weeks<br><input type="checkbox"/> Weight loss<br><input type="checkbox"/> Night sweats<br><input type="checkbox"/> Hemoptysis<br><input type="checkbox"/> Others:             | Mark multiple boxes if there are multiple answers                                                                                          |
| 19. | Did health worker facilitate the linkage of identified presumptive TB patient to get the investigations done?               | Yes / No                                                                                                                                                                                                                                                                                                                                                                                                             | Were any additional efforts made to ensure whether the identified presumptive TB patient undergoes the investigations for diagnosis of TB? |
| 20. | How the presumptive TB patients were linked to the investigations?                                                          | <input type="checkbox"/> Issued referral letter to get the investigations done at DMC<br><input type="checkbox"/> Accompanied referral<br><input type="checkbox"/> Sputum was collected and transported by the health worker<br><input type="checkbox"/> Travel support was provided to patient<br><input type="checkbox"/> Vouchers/monetary support to get the chest X-ray<br><input type="checkbox"/> Any others: | If the answer is 'No' to previous question, please skip this question                                                                      |
| 21. | Mobile vans / temporary depot for TB screening stationed in the activity area                                               | Yes / No                                                                                                                                                                                                                                                                                                                                                                                                             |                                                                                                                                            |
| 22. | Investigations used for diagnosis of TB in presumptive TB patients                                                          | <input type="checkbox"/> Only Sputum Smear Microscopy                                                                                                                                                                                                                                                                                                                                                                | Please tick the appropriate algorithm followed by the team                                                                                 |

|                         |                                                                                           |                                                                                                                                                                                                                                                                                                                                                                                                                                                                                                                                                                                                                                                                                                                                            |                                                                                                                                                                          |
|-------------------------|-------------------------------------------------------------------------------------------|--------------------------------------------------------------------------------------------------------------------------------------------------------------------------------------------------------------------------------------------------------------------------------------------------------------------------------------------------------------------------------------------------------------------------------------------------------------------------------------------------------------------------------------------------------------------------------------------------------------------------------------------------------------------------------------------------------------------------------------------|--------------------------------------------------------------------------------------------------------------------------------------------------------------------------|
|                         |                                                                                           | <input type="checkbox"/> Sputum Smear Microscopy followed by chest x-ray for those with high clinical suspicion<br><input type="checkbox"/> Sputum Smear Microscopy and Chest x-ray in parallel<br><input type="checkbox"/> Sputum Smear Microscopy and Chest x-ray in parallel followed by GeneXpert when Chest x-ray is positive and sputum smear microscopy is negative<br><input type="checkbox"/> Upfront chest x-ray followed by Sputum Smear Microscopy (SSM) for only those with chest x-ray suggestive of TB<br><input type="checkbox"/> Upfront chest Xray followed by GeneXpert<br><input type="checkbox"/> GeneXpert and Chest Xray in parallel<br><input type="checkbox"/> Only GeneXpert<br><input type="checkbox"/> Others: |                                                                                                                                                                          |
| 23.                     | Case definition of 'Bacteriologically confirmed TB'                                       |                                                                                                                                                                                                                                                                                                                                                                                                                                                                                                                                                                                                                                                                                                                                            | Please provide how someone was labelled as bacteriologically confirmed TB under the project                                                                              |
| 24.                     | Case definition of 'Clinically diagnosed/smear negative pulmonary TB'                     |                                                                                                                                                                                                                                                                                                                                                                                                                                                                                                                                                                                                                                                                                                                                            | Please provide how someone was labelled as 'Clinically diagnosed/smear negative pulmonary TB' under the project                                                          |
| 25.                     | Did health worker facilitate the linkage of identified TB patient to avail the treatment? | Yes / No                                                                                                                                                                                                                                                                                                                                                                                                                                                                                                                                                                                                                                                                                                                                   | Any additional efforts made to ensure that the identified TB patient are linked to treatment                                                                             |
| 26.                     | Please describe how the health workers supported initiation of treatment                  |                                                                                                                                                                                                                                                                                                                                                                                                                                                                                                                                                                                                                                                                                                                                            | If you have answered 'No' to the previous question, please skip this question                                                                                            |
| 27.                     | Whether the treatment initiation details were recorded under the project?                 | Yes / No<br>If yes, details:                                                                                                                                                                                                                                                                                                                                                                                                                                                                                                                                                                                                                                                                                                               | Any additional efforts made to record the treatment initiation details of ALL the TB patients identified under the project                                               |
| 28.                     | Whether the treatment outcome details were recorded under the project?                    | Yes / No<br>If yes, details:                                                                                                                                                                                                                                                                                                                                                                                                                                                                                                                                                                                                                                                                                                               | Any additional efforts made to record the treatment outcomes of ALL the TB patients identified under the project                                                         |
| <b>Outputs/Outcomes</b> |                                                                                           |                                                                                                                                                                                                                                                                                                                                                                                                                                                                                                                                                                                                                                                                                                                                            |                                                                                                                                                                          |
| 29.                     | Total number of target population mapped for the activity                                 |                                                                                                                                                                                                                                                                                                                                                                                                                                                                                                                                                                                                                                                                                                                                            | This is the total number among whom you intended to conduct the ACF activity. It could be the population of the area you selected. If not available, please mention 'NA' |
| 30.                     | Number of individuals who underwent symptom screening                                     |                                                                                                                                                                                                                                                                                                                                                                                                                                                                                                                                                                                                                                                                                                                                            |                                                                                                                                                                          |
| 31.                     | Number of individuals screened positive during the symptom screening                      |                                                                                                                                                                                                                                                                                                                                                                                                                                                                                                                                                                                                                                                                                                                                            |                                                                                                                                                                          |
| 32.                     | Number of individuals who underwent Sputum smear microscopy                               |                                                                                                                                                                                                                                                                                                                                                                                                                                                                                                                                                                                                                                                                                                                                            |                                                                                                                                                                          |

|     |                                                                                                                                                                                                      |  |                                                                |
|-----|------------------------------------------------------------------------------------------------------------------------------------------------------------------------------------------------------|--|----------------------------------------------------------------|
| 33. | Number of individuals who underwent Chest X-ray                                                                                                                                                      |  |                                                                |
| 34. | Number of individuals who underwent Genexpert                                                                                                                                                        |  |                                                                |
| 35. | Number of individuals diagnosed with pulmonary TB                                                                                                                                                    |  |                                                                |
| 36. | Number of patients diagnosed by sputum smear microscopy                                                                                                                                              |  |                                                                |
| 37. | Number of patients diagnosed by Chest X-ray                                                                                                                                                          |  |                                                                |
| 38. | Number of patients diagnosed by Genexpert                                                                                                                                                            |  |                                                                |
| 39. | Number of patients diagnosed as bacteriologically confirmed pulmonary TB                                                                                                                             |  |                                                                |
| 40. | Number of patients diagnosed as clinically diagnosed pulmonary TB                                                                                                                                    |  |                                                                |
| 41. | Number of false positive results                                                                                                                                                                     |  | Positive on Sputum smear microscopy but negative on Gene Xpert |
| 42. | Number of patients clinically diagnosed with Extra-pulmonary TB cases                                                                                                                                |  |                                                                |
| 43. | Number of TB patients initiated on treatment                                                                                                                                                         |  |                                                                |
| 44. | Number of individuals completing the treatment?                                                                                                                                                      |  | Mention the method used to check adherence, if any             |
| 45. | Number of deaths among the patients initiated on treatment                                                                                                                                           |  |                                                                |
| 46. | Number of loss-to-follow up among the patients initiated on treatment                                                                                                                                |  |                                                                |
| 47. | Any documentation of change in TB case notification rate due to ACF?                                                                                                                                 |  |                                                                |
| 48. | Additional comments:<br>(Note: If there are any additional comments, regarding implementing the ACF programme or documenting data please feel free to provide more information in additional sheets) |  |                                                                |

Please provide the details of contact person, who can be contacted to get clarification on the above mentioned details:

1. Name:
2. Designation:
3. Organisation:
4. Mobile No:
5. Email id:
